# Supplementary material
Source: publisher figshare collection journal article supplement (https://acs.figshare.com/ndownloader/files/5337913)
Supplement: Supplementary file 1 [file 5337913]

data_General
_audit_creation_date                  '2007-11-05'
_audit_creation_method                'by CrystalStructure 3.8'
_audit_update_record                   ?

#==============================================================================

# PROCESSING SUMMARY (IUCr Office Use Only)

_journal_date_recd_electronic     ?
_journal_date_from_coeditor       ?
_journal_date_accepted            ?
_journal_coeditor_code            ?

#==============================================================================

# SUBMISSION DETAILS

_publ_contact_author_name             'ENTER NAME'
_publ_contact_author_email            'ENTER EMAIL ADDRESS'
_publ_contact_author_fax              'ENTER FAX NUMBER'
_publ_contact_author_phone            'ENTER PHONE NUMBER'
_publ_contact_letter
;
    ENTER TEXT OF LETTER
;
_publ_requested_journal               test
_publ_requested_category              'CHOOSE FI FM FO CI CM CO or AD'
_publ_requested_coeditor_name          ?

#==============================================================================

# TITLE AND AUTHOR LIST

_publ_section_title
;
    ENTER SECTION TITLE
;
_publ_section_title_footnote
;
    ENTER FOOTNOTE TO TITLE OF PAPER
;
loop_
_publ_author_name
_publ_author_footnote
_publ_author_address
' FIRST AUTHORS NAME '
;
  FIRST AUTHORS FOOTNOTES
;
;
  FIRST AUTHORS ADDRESS
;
_publ_section_synopsis
;
  ENTER SYNOPSIS
;

#==============================================================================

# TEXT

_publ_section_abstract
;
    ENTER ABSTRACT
;
_publ_section_comment
;
    ENTER TEXT
;
_publ_section_references
;
    ENTER OTHER REFERENCES

    Johnson, C.K. (1976). ORTEP-II. A FORTRAN Thermal-Ellipsoid Plot
    Program. Report ORNL-5138. Oak Ridge National Laboratory, 
    Tennessee, USA.

    Rigaku (1998). PROCESS-AUTO. Automatic Data Acquisition and Processing
    Package for Imaging Plate Diffractometer. Rigaku Corporation, Tokyo
    196-8666, Japan

    Rigaku & RAC (2007). CrystalStructure (Version 3.80). Single Crystal
    Structure Analysis Software. Rigaku, Tokyo 196-8666, Japan. Rigaku
    Americas, TX, USA 77381-5209.
    
    Sheldrick, G.M. (1997). SHELXS97. Program for the Solution of Crystal
    Structures. University of Gottingen, Germany.

    Sheldrick, G.M. (1997). SHELXL97. University of Gottingen, Germany.

;
_publ_section_figure_captions
;
    ENTER FIGURE CAPTIONS
;
_publ_section_exptl_prep
;
    ENTER COMPOUND PREPARATION DETAILS
;
_publ_section_exptl_refinement
;
    ENTER SPECIAL DETAILS OF THE REFINEMENT
;

#==============================================================================

data__AN-oMe-5

#==============================================================================

# CHEMICAL DATA

_chemical_formula_sum                  'C19 H24 N2 O3 '
_chemical_formula_moiety               'C19 H24 N2 O3 '
_chemical_formula_weight               328.41
_chemical_melting_point                ?
_chemical_absolute_configuration       ad 

#==============================================================================

# CRYSTAL DATA
_symmetry_cell_setting                 orthorhombic
_symmetry_space_group_name_H-M        'P 21 21 21'
_symmetry_space_group_name_Hall       'P 2ac 2ab'
_symmetry_Int_Tables_number            19
loop_
_symmetry_equiv_pos_site_id
_symmetry_equiv_pos_as_xyz
1   '+X,+Y,+Z'
2   '1/2+X,1/2-Y,-Z'
3   '-X,1/2+Y,1/2-Z'
4   '1/2-X,-Y,1/2+Z'

#------------------------------------------------------------------------------

_cell_length_a                         7.49574(16)
_cell_length_b                         10.9673(2)
_cell_length_c                         21.8976(5)
_cell_angle_alpha                      90.0000
_cell_angle_beta                       90.0000
_cell_angle_gamma                      90.0000
_cell_volume                           1800.15(7)
_cell_formula_units_Z                  4
_cell_measurement_reflns_used          14652
_cell_measurement_theta_min            5.7
_cell_measurement_theta_max            68.2
_cell_measurement_temperature          153.1

#------------------------------------------------------------------------------

_exptl_crystal_description            'block'
_exptl_crystal_colour                 'colorless'
_exptl_crystal_size_max                0.25
_exptl_crystal_size_mid                0.20
_exptl_crystal_size_min                0.10
_exptl_crystal_density_diffrn          1.212
_exptl_crystal_density_meas            ?
_exptl_crystal_density_method         'not measured'
_exptl_crystal_F_000                   704.00
_exptl_absorpt_coefficient_mu          0.664
_exptl_absorpt_correction_type         multi-scan
_exptl_absorpt_process_details         
;
    Higashi, T. (1995). Program for Absorption Correction.
    Rigaku Corporation, Tokyo, Japan.
;
_exptl_absorpt_correction_T_min        0.801
_exptl_absorpt_correction_T_max        0.936

#==============================================================================

# EXPERIMENTAL DATA

_diffrn_radiation_type                'Cu K\a'
_diffrn_radiation_wavelength           1.54187
_diffrn_measurement_device_type       'Rigaku RAXIS-RAPID'
_diffrn_measurement_method             \w
_diffrn_detector_area_resol_mean       10.00
_diffrn_reflns_number                  20870
_diffrn_reflns_av_R_equivalents        0.034
_diffrn_reflns_theta_max               68.24
_diffrn_measured_fraction_theta_max    0.998
_diffrn_reflns_theta_full              68.24
_diffrn_measured_fraction_theta_full   0.998
_diffrn_reflns_limit_h_min             -9
_diffrn_reflns_limit_h_max             9
_diffrn_reflns_limit_k_min             -13
_diffrn_reflns_limit_k_max             13
_diffrn_reflns_limit_l_min             -26
_diffrn_reflns_limit_l_max             26

#==============================================================================

# REFINEMENT DATA

_refine_special_details
;
    Refinement was performed using all reflections. The weighted 
    R-factor (wR) and goodness of fit (S) are based on F^2^.
    R-factor (gt) are based on F. The threshold expression of
    F^2^ > 2.0 sigma(F^2^) is used only for calculating R-factor (gt).
;
_reflns_number_total                   3281
_reflns_number_gt                      2725
_reflns_threshold_expression           F^2^>2.0\s(F^2^)
_refine_ls_structure_factor_coef       Fsqd
_refine_ls_R_factor_gt                 0.0328
_refine_ls_wR_factor_ref               0.0848
_refine_ls_hydrogen_treatment          constr
_refine_ls_number_reflns               3281
_refine_ls_number_parameters           223
_refine_ls_goodness_of_fit_ref         1.199
_refine_ls_weighting_scheme            calc
_refine_ls_weighting_details
   'w = 1/[\s^2^(Fo^2^)+(0.0259P)^2^+0.3365P] where P=(Fo^2^+2Fc^2^)/3'
_refine_ls_shift/su_max                0.0000
_refine_diff_density_max               0.14
_refine_diff_density_min               -0.16
_refine_ls_extinction_method           SHELXL
_refine_ls_extinction_coef             0.0026(2)
_refine_ls_abs_structure_details
   'Flack, H. D. (1983), Acta Cryst. A39, 876-881.  1376 Friedel Pairs'
_refine_ls_abs_structure_Flack         -0.2(2)

loop_
_atom_type_symbol
_atom_type_description
_atom_type_scat_dispersion_real
_atom_type_scat_dispersion_imag
_atom_type_scat_source
  'C' 'C'  0.018 0.009 
;
International Tables for Crystallography
(1992, Vol. C, Tables 4.2.6.8 and 6.1.1.4)
;
  'H' 'H'  0.000 0.000 
;
International Tables for Crystallography
(1992, Vol. C, Table 6.1.1.4)
;
  'N' 'N'  0.031 0.018 
;
International Tables for Crystallography
(1992, Vol. C, Tables 4.2.6.8 and 6.1.1.4)
;
  'O' 'O'  0.049 0.032 
;
International Tables for Crystallography
(1992, Vol. C, Tables 4.2.6.8 and 6.1.1.4)
;

#==============================================================================

# ATOMIC COORDINATES AND THERMAL PARAMETERS

loop_
_atom_site_label
_atom_site_type_symbol
_atom_site_fract_x
_atom_site_fract_y
_atom_site_fract_z
_atom_site_U_iso_or_equiv
_atom_site_adp_type
_atom_site_occupancy
_atom_site_symmetry_multiplicity
_atom_site_calc_flag
_atom_site_refinement_flags
_atom_site_disorder_assembly
_atom_site_disorder_group
 O(1) O 0.44028(19) 0.48103(12) 0.61052(7) 0.0463(3) Uani 1.00 1 d . . .
 O(2) O 0.15439(17) 0.41171(10) 0.62021(6) 0.0368(3) Uani 1.00 1 d . . .
 O(3) O -0.05001(18) 0.74835(12) 0.70110(7) 0.0450(3) Uani 1.00 1 d . . .
 N(1) N 0.2121(2) 0.60478(13) 0.63735(7) 0.0371(4) Uani 1.00 1 d . . .
 N(2) N 0.3207(2) 0.60447(16) 0.79241(9) 0.0471(4) Uani 1.00 1 d . . .
 C(1) C 0.3049(2) 0.80171(17) 0.59253(9) 0.0336(4) Uani 1.00 1 d . . .
 C(2) C 0.4554(2) 0.85771(18) 0.56725(10) 0.0389(5) Uani 1.00 1 d . . .
 C(3) C 0.4324(3) 0.93165(18) 0.51596(10) 0.0452(5) Uani 1.00 1 d . . .
 C(4) C 0.2676(3) 0.95276(19) 0.49038(10) 0.0469(5) Uani 1.00 1 d . . .
 C(5) C 0.1183(3) 0.89952(19) 0.51599(10) 0.0433(5) Uani 1.00 1 d . . .
 C(6) C 0.1379(2) 0.82395(17) 0.56633(9) 0.0382(4) Uani 1.00 1 d . . .
 C(7) C 0.6412(2) 0.8402(2) 0.59225(11) 0.0504(6) Uani 1.00 1 d . . .
 C(8) C 0.3201(2) 0.71365(16) 0.64557(9) 0.0332(4) Uani 1.00 1 d . . .
 C(9) C 0.2842(2) 0.49703(17) 0.62153(9) 0.0340(4) Uani 1.00 1 d . . .
 C(10) C 0.1928(2) 0.28581(17) 0.59979(9) 0.0381(4) Uani 1.00 1 d . . .
 C(11) C 0.2498(3) 0.2880(2) 0.53361(10) 0.0534(6) Uani 1.00 1 d . . .
 C(12) C 0.3306(3) 0.2274(2) 0.64076(12) 0.0599(6) Uani 1.00 1 d . . .
 C(13) C 0.0136(2) 0.22419(19) 0.60730(10) 0.0487(5) Uani 1.00 1 d . . .
 C(14) C 0.2744(2) 0.77193(16) 0.70851(9) 0.0334(4) Uani 1.00 1 d . . .
 C(15) C 0.0755(2) 0.81231(17) 0.71420(9) 0.0347(4) Uani 1.00 1 d . . .
 C(16) C 0.0690(3) 0.93885(18) 0.73995(10) 0.0451(5) Uani 1.00 1 d . . .
 C(17) C 0.2530(3) 0.95848(18) 0.76793(10) 0.0460(5) Uani 1.00 1 d . . .
 C(18) C 0.3763(2) 0.88873(16) 0.72521(9) 0.0377(4) Uani 1.00 1 d . . .
 C(19) C 0.3009(2) 0.67769(17) 0.75600(9) 0.0356(4) Uani 1.00 1 d . . .
 H(1) H 0.5343 0.9688 0.4980 0.054 Uiso 1.00 1 c R . .
 H(1N) H 0.0960 0.6095 0.6429 0.044 Uiso 1.00 1 c R . .
 H(2) H 0.2566 1.0035 0.4554 0.056 Uiso 1.00 1 c R . .
 H(3) H 0.0034 0.9145 0.4993 0.052 Uiso 1.00 1 c R . .
 H(4) H 0.0353 0.7863 0.5834 0.046 Uiso 1.00 1 c R . .
 H(5) H 0.6493 0.8773 0.6329 0.060 Uiso 1.00 1 c R . .
 H(6) H 0.7277 0.8790 0.5649 0.060 Uiso 1.00 1 c R . .
 H(7) H 0.6674 0.7528 0.5952 0.060 Uiso 1.00 1 c R . .
 H(8) H 0.4474 0.6866 0.6475 0.040 Uiso 1.00 1 c R . .
 H(9) H 0.1577 0.3283 0.5091 0.064 Uiso 1.00 1 c R . .
 H(10) H 0.2663 0.2043 0.5190 0.064 Uiso 1.00 1 c R . .
 H(11) H 0.3624 0.3328 0.5298 0.064 Uiso 1.00 1 c R . .
 H(12) H 0.4467 0.2661 0.6339 0.072 Uiso 1.00 1 c R . .
 H(13) H 0.3389 0.1402 0.6314 0.072 Uiso 1.00 1 c R . .
 H(14) H 0.2954 0.2381 0.6835 0.072 Uiso 1.00 1 c R . .
 H(15) H -0.0192 0.2230 0.6506 0.058 Uiso 1.00 1 c R . .
 H(16) H 0.0207 0.1404 0.5920 0.058 Uiso 1.00 1 c R . .
 H(17) H -0.0769 0.2692 0.5842 0.058 Uiso 1.00 1 c R . .
 H(18) H -0.0253 0.9457 0.7714 0.054 Uiso 1.00 1 c R . .
 H(19) H 0.0456 0.9994 0.7074 0.054 Uiso 1.00 1 c R . .
 H(20) H 0.2840 1.0462 0.7690 0.055 Uiso 1.00 1 c R . .
 H(21) H 0.2586 0.9252 0.8099 0.055 Uiso 1.00 1 c R . .
 H(22) H 0.4901 0.8688 0.7459 0.045 Uiso 1.00 1 c R . .
 H(23) H 0.4026 0.9374 0.6882 0.045 Uiso 1.00 1 c R . .


loop_
_atom_site_aniso_label
_atom_site_aniso_U_11
_atom_site_aniso_U_22
_atom_site_aniso_U_33
_atom_site_aniso_U_12
_atom_site_aniso_U_13
_atom_site_aniso_U_23
 O(1) 0.0399(8) 0.0362(7) 0.0629(10) 0.0010(6) 0.0125(7) -0.0061(7)
 O(2) 0.0437(7) 0.0251(6) 0.0414(8) -0.0043(5) 0.0039(6) -0.0050(5)
 O(3) 0.0363(7) 0.0456(8) 0.0531(9) 0.0005(7) 0.0003(6) -0.0009(7)
 N(1) 0.0337(8) 0.0255(7) 0.0519(11) -0.0002(6) 0.0004(8) -0.0038(7)
 N(2) 0.0468(10) 0.0386(9) 0.0560(11) 0.0017(8) -0.0054(9) 0.0083(9)
 C(1) 0.0346(10) 0.0273(9) 0.0389(11) 0.0006(8) 0.0027(8) -0.0046(8)
 C(2) 0.0361(11) 0.0336(10) 0.0469(13) -0.0030(9) 0.0077(10) -0.0089(9)
 C(3) 0.0530(13) 0.0360(10) 0.0466(13) -0.0076(10) 0.0132(11) -0.0036(10)
 C(4) 0.0690(16) 0.0325(11) 0.0391(12) -0.0001(10) 0.0037(11) -0.0004(9)
 C(5) 0.0482(12) 0.0406(11) 0.0411(12) 0.0038(10) -0.0044(10) -0.0016(10)
 C(6) 0.0393(11) 0.0336(10) 0.0418(12) -0.0014(9) 0.0002(9) -0.0001(9)
 C(7) 0.0350(11) 0.0527(13) 0.0634(15) -0.0056(10) 0.0082(10) -0.0073(11)
 C(8) 0.0313(10) 0.0264(9) 0.0419(11) -0.0013(8) 0.0012(8) -0.0044(8)
 C(9) 0.0423(11) 0.0282(9) 0.0314(10) -0.0015(8) 0.0022(9) 0.0007(8)
 C(10) 0.0542(12) 0.0232(9) 0.0369(11) 0.0012(9) -0.0011(9) -0.0026(8)
 C(11) 0.0784(17) 0.0357(11) 0.0463(13) 0.0013(11) 0.0114(12) -0.0087(10)
 C(12) 0.0741(16) 0.0346(11) 0.0710(17) 0.0044(11) -0.0177(13) 0.0071(11)
 C(13) 0.0631(14) 0.0328(10) 0.0503(13) -0.0086(10) -0.0012(11) -0.0069(10)
 C(14) 0.0335(10) 0.0256(8) 0.0411(11) 0.0002(8) -0.0022(8) 0.0008(8)
 C(15) 0.0380(11) 0.0350(10) 0.0312(10) 0.0049(9) 0.0037(8) 0.0036(8)
 C(16) 0.0539(13) 0.0358(10) 0.0456(13) 0.0075(10) 0.0057(11) -0.0034(9)
 C(17) 0.0643(15) 0.0319(10) 0.0419(12) -0.0020(10) 0.0006(10) -0.0047(9)
 C(18) 0.0439(11) 0.0267(9) 0.0426(12) -0.0039(8) -0.0051(9) -0.0003(8)
 C(19) 0.0324(10) 0.0283(9) 0.0462(12) 0.0004(8) -0.0023(9) 0.0008(9)

#==============================================================================

_computing_data_collection            'PROCESS-AUTO (Rigaku, 1998)'
_computing_cell_refinement            'PROCESS-AUTO (Rigaku, 1998)'
_computing_data_reduction         'CrystalStructure (Rigaku & RAC 2007)'
_computing_structure_solution         'SHELXS97 (Sheldrick, 1997)'
_computing_structure_refinement       'SHELXL97 (Sheldrick, 1997)' 
_computing_publication_material   'CrystalStructure (Rigaku & RAC 2007)'
_computing_molecular_graphics         'ORTEP (Johnson, 1976)'

#==============================================================================

# MOLECULAR GEOMETRY

_geom_special_details
;
    ENTER SPECIAL DETAILS OF THE MOLECULAR GEOMETRY
;

loop_
_geom_bond_atom_site_label_1
_geom_bond_atom_site_label_2
_geom_bond_distance
_geom_bond_publ_flag
_geom_bond_site_symmetry_1
_geom_bond_site_symmetry_2
O(1) C(9) 1.208(2) yes . .
O(2) C(9) 1.350(2) yes . .
O(2) C(10) 1.480(2) yes . .
O(3) C(15) 1.208(2) yes . .
N(1) C(8) 1.454(2) yes . .
N(1) C(9) 1.345(2) yes . .
N(2) C(19) 1.141(2) yes . .
C(1) C(2) 1.399(2) yes . .
C(1) C(6) 1.398(2) yes . .
C(1) C(8) 1.515(2) yes . .
C(2) C(3) 1.396(2) yes . .
C(2) C(7) 1.509(2) yes . .
C(3) C(4) 1.376(3) yes . .
C(4) C(5) 1.381(3) yes . .
C(5) C(6) 1.387(2) yes . .
C(8) C(14) 1.557(2) yes . .
C(10) C(11) 1.511(2) yes . .
C(10) C(12) 1.511(3) yes . .
C(10) C(13) 1.513(2) yes . .
C(14) C(15) 1.560(2) yes . .
C(14) C(18) 1.536(2) yes . .
C(14) C(19) 1.480(2) yes . .
C(15) C(16) 1.499(2) yes . .
C(16) C(17) 1.524(3) yes . .
C(17) C(18) 1.522(2) yes . .

loop_
_geom_angle_atom_site_label_1
_geom_angle_atom_site_label_2
_geom_angle_atom_site_label_3
_geom_angle
_geom_angle_publ_flag
_geom_angle_site_symmetry_1
_geom_angle_site_symmetry_2
_geom_angle_site_symmetry_3
C(9) O(2) C(10) 120.88(14) yes . . .
C(8) N(1) C(9) 121.99(15) yes . . .
C(2) C(1) C(6) 118.88(17) yes . . .
C(2) C(1) C(8) 121.53(17) yes . . .
C(6) C(1) C(8) 119.53(16) yes . . .
C(1) C(2) C(3) 118.28(19) yes . . .
C(1) C(2) C(7) 123.02(18) yes . . .
C(3) C(2) C(7) 118.69(19) yes . . .
C(2) C(3) C(4) 122.4(2) yes . . .
C(3) C(4) C(5) 119.4(2) yes . . .
C(4) C(5) C(6) 119.3(2) yes . . .
C(1) C(6) C(5) 121.69(19) yes . . .
N(1) C(8) C(1) 112.76(15) yes . . .
N(1) C(8) C(14) 108.91(14) yes . . .
C(1) C(8) C(14) 113.60(14) yes . . .
O(1) C(9) O(2) 126.38(17) yes . . .
O(1) C(9) N(1) 124.64(17) yes . . .
O(2) C(9) N(1) 108.97(16) yes . . .
O(2) C(10) C(11) 109.26(15) yes . . .
O(2) C(10) C(12) 110.43(16) yes . . .
O(2) C(10) C(13) 102.21(15) yes . . .
C(11) C(10) C(12) 112.51(18) yes . . .
C(11) C(10) C(13) 111.26(17) yes . . .
C(12) C(10) C(13) 110.68(17) yes . . .
C(8) C(14) C(15) 113.41(15) yes . . .
C(8) C(14) C(18) 116.34(15) yes . . .
C(8) C(14) C(19) 107.81(14) yes . . .
C(15) C(14) C(18) 102.69(14) yes . . .
C(15) C(14) C(19) 105.68(15) yes . . .
C(18) C(14) C(19) 110.40(15) yes . . .
O(3) C(15) C(14) 124.08(16) yes . . .
O(3) C(15) C(16) 127.01(18) yes . . .
C(14) C(15) C(16) 108.88(16) yes . . .
C(15) C(16) C(17) 104.65(16) yes . . .
C(16) C(17) C(18) 103.40(16) yes . . .
C(14) C(18) C(17) 105.26(15) yes . . .
N(2) C(19) C(14) 179.6(2) yes . . .


#==END=========================================================================
